# Supplementary material for: Diversity of honey stores and their impact on pathogenic bacteria of the honeybee, Apis mellifera
Source: PubMed Central journal article supplement (PMC4242578; doi:10.1002/ece3.1252), 2014-09-26
Supplement: ece30004-3960-SD1.pdf [file ece30004-3960-SD1.pdf]

## Diversity of honey stores and their impact on pathogenic bacteria of the honeybee,

*Apis mellifera*

### **Supporting Information**

#### **Appendix S1: Bacteria species verification**

DNA was isolated from pathogens using the DNeasy Blood & Tissue Kit (Qiagen, Hilden, Germany) protocol for gram-positive and -negative bacteria, from bacterial cultures with an OD<sub>600</sub> higher than 1. DNA was eluted in 100 µL sterile water and stored at -20 °C until further processing.

To verify whether the bacterial strains used were not contaminated after several sub-culturing steps, amplification of bacterial DNA with universal bacteria 16sRNA primer (Simone et al., 2009) was done using PCR Master Mix (Thermo Fisher Scientific, Bremen, Germany), 0.2 µM of each primer and 1 µl diluted bacterial DNA (1:100); and the following PCR protocol: 95 °C for 3 min; 35 cycles with 95 °C for 1 min, 57 °C for 30 sec, 72 °C for 1 min; and final elongation at 72 °C for 5 min. PCR product size was verified by automated capillary electrophoresis (QIAxcel system) using the High Resolution Cartridge (Qiagen, Hilden, Germany). PCR products were purified using Sure Clean (Bioline, Luckenwalde, Germany) and sent to Macrogen (Amsterdam, Netherlands) for sequencing.

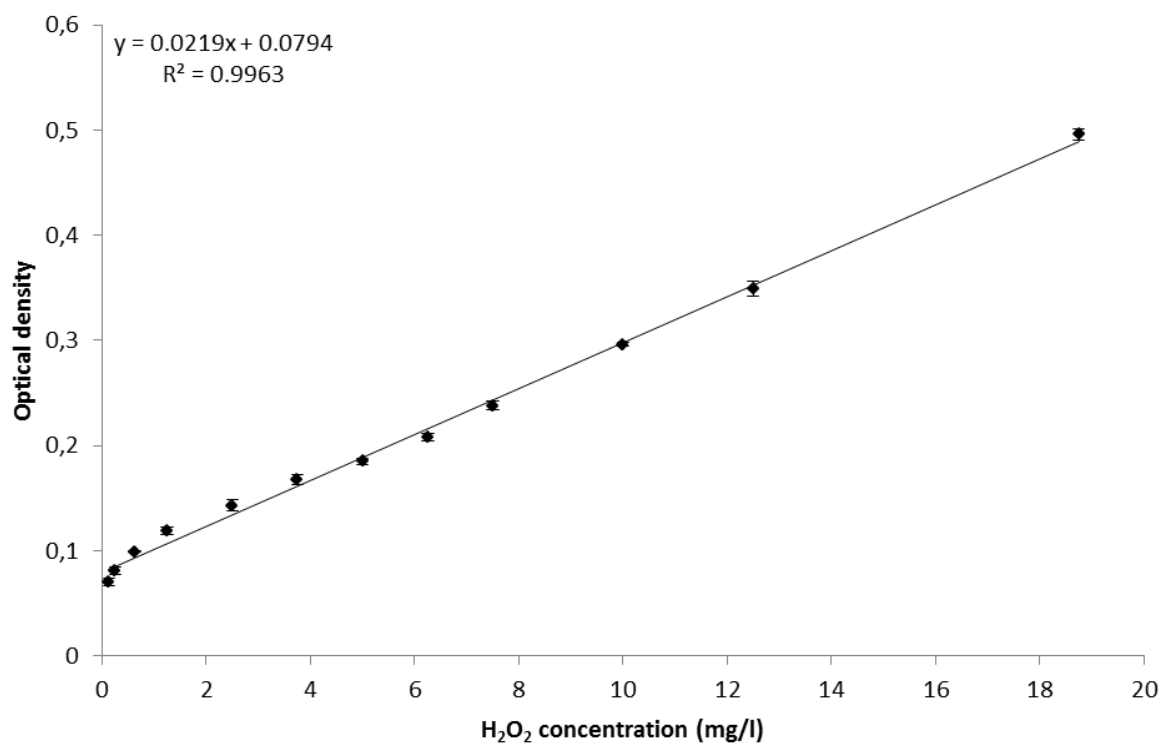

**Fig. S1** Calibration curve to determine hydrogen peroxide content. Five replicates were used for each data point (Mean  $\pm$  SE).

**Table S1** Physicochemical analysis of different honeys.

| Analysed parameter                                       | Honey type |           |              |
|----------------------------------------------------------|------------|-----------|--------------|
|                                                          | Polyfloral | Sunflower | Black locust |
| pH                                                       | 4.0        | 3.8       | 4.0          |
| Water content (%)                                        | 16.8       | 18.1      | 16.0         |
| Free acidity (meq/kg)                                    | 17.0       | 25.7      | 6.5          |
| Lactonic acidity (meq/kg)                                | 13.0       | 21.9      | 5.9          |
| Total acidity (meq/kg)                                   | 30.0       | 47.6      | 12.4         |
| Glucose (%)                                              | 39.3       | 38.4      | 28.0         |
| Fructose (%)                                             | 38.9       | 39.0      | 44.0         |
| Sucrose (%)                                              | 0.3        | 0.1       | 0.8          |
| Turanose (%)                                             | 1.2        | 1.1       | 2.5          |
| Maltose (%)                                              | 2.7        | 1.5       | 4.0          |
| Isomaltose (%)                                           | 0.3        | 0.2       | 0.5          |
| Fructose/glucose                                         | 1.0        | 1.0       | 1.6          |
| Total sugar (%)                                          | 82.8       | 80.3      | 79.8         |
| Diastase activity (Schade units/g)                       | 49.3       | 22.6      | 28.5         |
| Hydroxymethylfurfural (mg/kg)                            | 0.4        | 8.5       | 2.7          |
| Antioxidant activity (DPPH assay)<br>(% inhibition)      | 17.4       | 28.9      | 15.7         |
| Total polyphenols (gallic acid equivalent)<br>(mg/100 g) | 84.7       | 41.5      | 34.8         |
| Total flavonoids (quercetin equivalent)<br>(mg/100 g)    | 20.0       | 19.5      | 10.2         |
| H <sub>2</sub> O <sub>2</sub> (mg/l)                     | 3.81       | n.d.      | 3.62         |

meq, milliequivalent; n.d., not detectable

**Table S2** Maximal slopes from growth curves ( $b = \text{mean} \times 10^{-3} \pm \text{SE} \times 10^{-3}$ ) of bacterial cultivation with sugar and honey treatment, and growth inhibition ( $I$ ) in % of the positive control. Slopes are shown as absolute values.

|                           |     | <i>P. larvae</i> ERIC I |          | <i>P. larvae</i> ERIC III |          | <i>P. larvae</i> ERIC IV |          | <i>M. plutonius</i> |          | <i>P. alvei</i> |          | <i>B. laterosporus</i> |          | <i>E. faecalis</i> |          | <i>B. pumilus</i> |          |
|---------------------------|-----|-------------------------|----------|---------------------------|----------|--------------------------|----------|---------------------|----------|-----------------|----------|------------------------|----------|--------------------|----------|-------------------|----------|
|                           |     | <i>b</i>                | <i>I</i> | <i>b</i>                  | <i>I</i> | <i>b</i>                 | <i>I</i> | <i>b</i>            | <i>I</i> | <i>b</i>        | <i>I</i> | <i>b</i>               | <i>I</i> | <i>b</i>           | <i>I</i> | <i>b</i>          | <i>I</i> |
| <b>Positive control</b>   |     | 27 ± 4                  | 0        | 23 ± 0.5                  | 0        | 59 ± 7                   | 0        | 22 ± 4              | 0        | 20 ± 0.2        | 0        | 28 ± 6                 | 0        | 127 ± 5            | 0        | 88 ± 9            | 0        |
| <b>Sugar</b>              | 50% | 0                       | 100      | 0                         | 100      | 0                        | 100      | 0                   | 100      | 0               | 100      | 0                      | 100      | 18 ± 2             | 86       | 0                 | 100      |
|                           | 25% | 0                       | 100      | 2 ± 0.6                   | 91       | 3 ± 0.7                  | 95       | 0                   | 100      | 0               | 100      | 0                      | 100      | 41 ± 2             | 68       | 19 ± 5            | 78       |
|                           | 10% | 9 ± 2                   | 67       | 24 ± 4                    | -4       | 39 ± 2                   | 34       | 9 ± 4               | 74       | 10 ± 0.6        | 50       | 18 ± 4                 | 36       | 88 ± 1             | 31       | 50 ± 3            | 43       |
|                           | 5%  | 15 ± 1                  | 44       | 20 ± 2                    | 13       | 35 ± 2                   | 41       | 13 ± 6              | 41       | 20 ± 0.3        | 0        | 22 ± 1                 | 21       | 102 ± 7            | 20       | 63 ± 4            | 37       |
| <b>Polyfloral honey</b>   | 50% | 0                       | 100      | 0                         | 100      | 0                        | 100      | 0                   | 100      | 0               | 100      | 0                      | 100      | 0                  | 100      | 0                 | 100      |
|                           | 25% | 0                       | 100      | 0                         | 100      | 0                        | 100      | 0                   | 100      | 0               | 100      | 0                      | 100      | 22 ± 1             | 83       | 0                 | 100      |
|                           | 10% | 0                       | 100      | 0                         | 100      | 10 ± 4                   | 83       | 0                   | 100      | 0               | 100      | 0                      | 100      | 57 ± 2             | 55       | 30 ± 2            | 66       |
|                           | 5%  | 20 ± 5                  | 26       | 14 ± 1                    | 39       | 21 ± 4                   | 64       | 9 ± 4               | 59       | 0               | 100      | 0                      | 100      | 77 ± 5             | 39       | 48 ± 4            | 45       |
| <b>Black locust honey</b> | 50% | 0                       | 100      | 0                         | 100      | 0                        | 100      | 0                   | 100      | 0               | 100      | 0                      | 100      | 0                  | 100      | 0                 | 100      |
|                           | 25% | 0                       | 100      | 0                         | 100      | 0                        | 100      | 0                   | 100      | 0               | 100      | 0                      | 100      | 27 ± 0.3           | 79       | 0                 | 100      |
|                           | 10% | 5 ± 5                   | 81       | 10 ± 0.6                  | 57       | 18 ± 1                   | 69       | 3 ± 8               | 82       | 0               | 100      | 0                      | 100      | 35 ± 0.2           | 72       | 36 ± 1            | 59       |
|                           | 5%  | 9 ± 9                   | 67       | 23 ± 0.5                  | 0        | 40 ± 2                   | 32       | 12 ± 6              | 45       | 13 ± 1          | 35       | 0                      | 100      | 77 ± 1             | 39       | 42 ± 4            | 52       |
| <b>Sunflower honey</b>    | 50% | 0                       | 100      | 0                         | 100      | 0                        | 100      | 0                   | 100      | 0               | 100      | 0                      | 100      | 0                  | 100      | 0                 | 100      |
|                           | 25% | 0                       | 100      | 0                         | 100      | 0                        | 100      | 0                   | 100      | 0               | 100      | 0                      | 100      | 27 ± 0.6           | 79       | 15 ± 0.5          | 83       |
|                           | 10% | 6 ± 1                   | 78       | 8 ± 0.3                   | 65       | 14 ± 0.3                 | 76       | 4 ± 8               | 82       | 0               | 100      | 7 ± 3                  | 75       | 56 ± 1             | 56       | 48 ± 6            | 45       |
|                           | 5%  | 12 ± 0.8                | 56       | 23 ± 2                    | 0        | 30 ± 3                   | 49       | 11 ± 1              | 50       | 15 ± 0.4        | 25       | 13 ± 2                 | 54       | 60 ± 4             | 53       | 55 ± 1            | 37       |

*b*, slope  $\times 10^{-3}$  of the linear growth curve

## Reference

Simone, M., Evans, J.D. & Spivak, M. (2009). Resin collection and social immunity in honey bees. *Evolution*, 63, 3016-3022
